# Supplementary material for: The Status of Data Management Practices Across German Medical Data Integration Centers: Mixed Methods Study
Source: PubMed Central journal article supplement (PMC10666010; doi:10.2196/48809), 2023-11-08
Supplement: jmir_v25i1e48809_app1.pdf [file jmir_v25i1e48809_app1.pdf]

Good Reporting of A Mixed Methods Study (GRAMMS) checklist [19]

Title: The Status of Data Management Practices Across German Medical Data Integration Centers: Mixed-Methods Study

| <b>Good reporting of a mixed-methods study (GRAMMS) guidance</b>                            | <b>Guidance met? (Section: page number in the manuscript)</b>                                                                       |
|---------------------------------------------------------------------------------------------|-------------------------------------------------------------------------------------------------------------------------------------|
| Describe the justification for using a mixed methods approach to the research question      | Yes<br>- Introduction and Methods/Study Design: pages 2-3<br>- Limitations and Methodological Implications: page 14                 |
| Describe the design in terms of the purpose, priority and sequence of methods               | Yes<br>- Methods / Study Design: page 3                                                                                             |
| Describe each method in terms of sampling, data collection and analysis                     | Yes<br>- Methods:<br>Study settings and participants: pages 3<br>Sample: page 3<br>Data collection: page 4<br>Data analysis: page 4 |
| Describe where integration has occurred, how it has occurred and who has participated in it | Yes<br>- Methods/Integration: page 4                                                                                                |
| Describe any limitation of one method associated with the present of the other method       | Yes<br>- Discussion/Limitations and Methodological Implications: pages 12-14                                                        |
| Describe any insights gained from mixing or integrating methods                             | Yes<br>- Discussion: pages 12-14                                                                                                    |
